# Supplementary material for: Emerging investigator series: quantification of multiwall carbon nanotubes in plant tissues with spectroscopic analysis
Source: Royal Society of Chemistry journal article supplement (doi:10.1039/c8en01252k), 2018-12-12
Supplement: c8en01252k1.pdf [file c8en01252k1.pdf]

*Supporting Information for*

**Quantification of Multiwall Carbon Nanotubes in Plant Tissues with  
Spectroscopic Analysis**

Kamol K. Das<sup>1</sup>, Valeria Nava<sup>1</sup>, Che-Wei Chang<sup>2</sup>, James W. Chan<sup>2</sup>, Baoshan Xing<sup>3</sup>, and Yu  
Yang<sup>1\*</sup>

<sup>1</sup>Department of Civil and Environmental Engineering, University of Nevada–Reno,  
1664 N. Virginia Street, Reno, NV 89557, USA;

<sup>2</sup>Center for Biophotonics, University of California, Davis,  
Sacramento, California 95817, USA;

<sup>3</sup>Stockbridge School of Agriculture, University of Massachusetts–Amherst,  
Amherst, MA 01003, USA.

\*Corresponding author, Yu Yang: email at [yuy@unr.edu](mailto:yuy@unr.edu)

**Calculation of detection limit.** Based on the regression in Figure 4,

$$ABS_{obs} - ABS_{BK} = k * C_{CNT} + b$$

Where  $ABS_{obs}$  is the observed absorbance at 800 nm,  $ABS_{BK}$  is the background absorbance value of leaf/stem/root,  $C_{CNT}$  is the concentration of CNT ( $\mu\text{g/g}$ ),  $k$  is the coefficient for  $C_{CNT}$ ,  $b$  is the regression constant. The detection limit for  $C_{CNT}$  was determined, when the difference between  $ABS_{obs}$  and  $ABS_{BK}$  equals to three times the standard deviation for  $ABS_{BK}$ . The corresponding values and detection limit for p/c-MWCNT in leaf/stem/root were listed in Table S4.

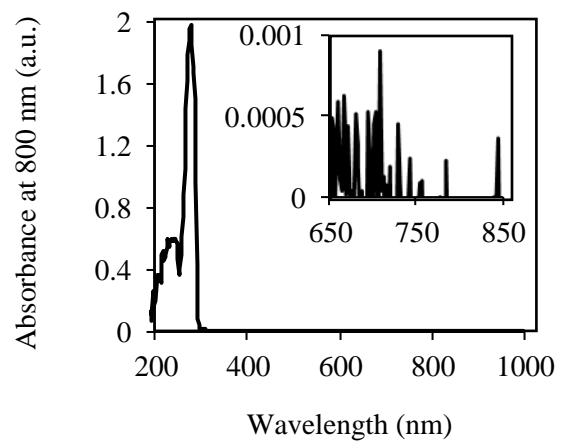

Figure S1: UV-Vis spectra of TX-100 (2.0 mg/mL) at 200-1000 nm. The peak was obtained at 276 nm, followed by a flat line reached at baseline after 300 nm.

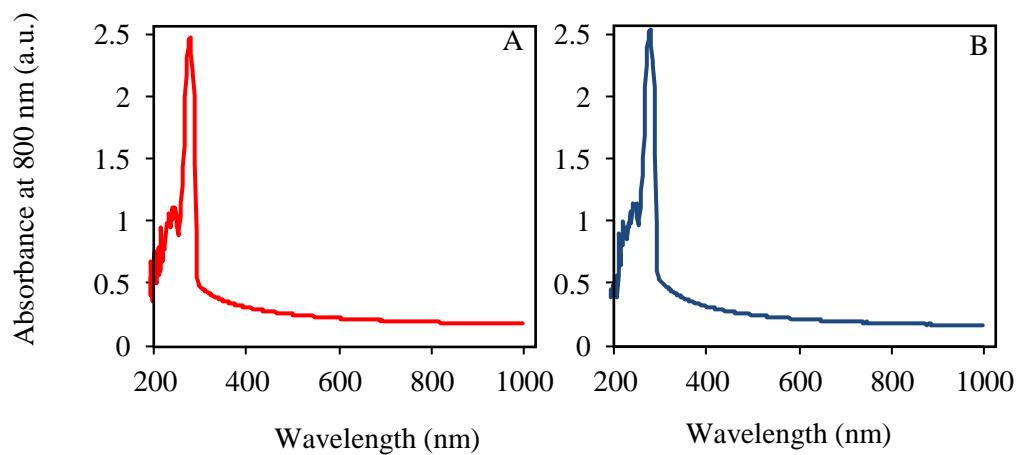

Figure S2: UV-Vis spectra of p-MWCNTs (A) and c-MWCNTs suspended with TX-100 (2.0 mg/mL) at 200-1000 nm. The peak was obtained at 276 nm from the TX-100, followed by featureless spectra at 300-900 nm.

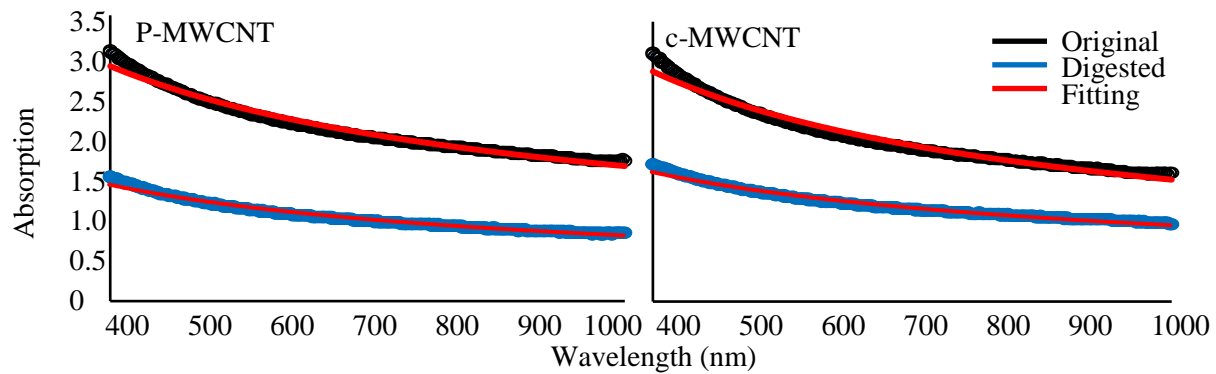

Figure S3: Power-law regression for wavelength-dependent absorption of MWCNTs

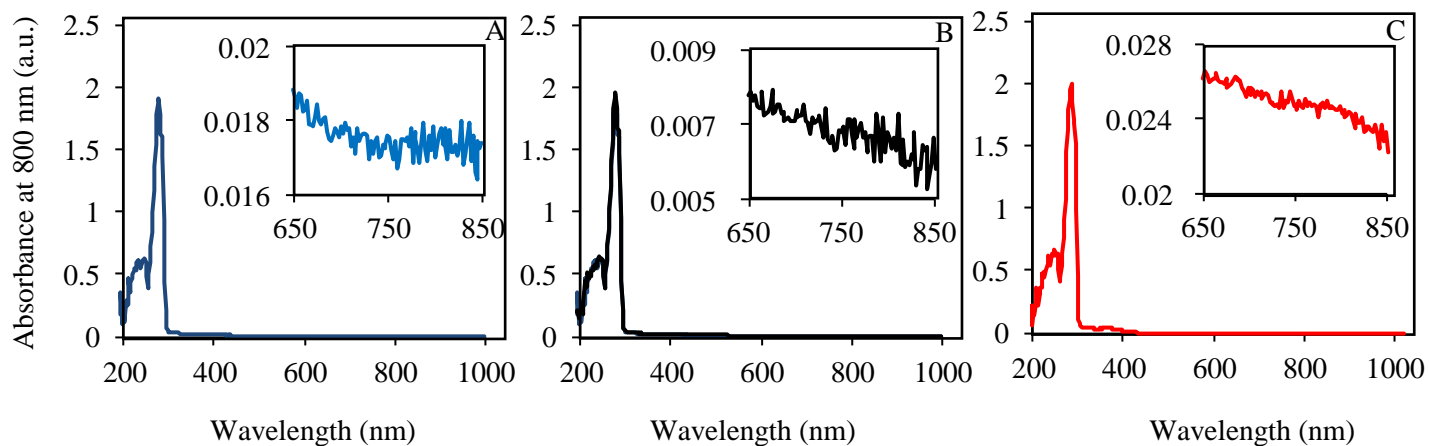

Figure S4: UV-Vis spectra of digested leaf and stem, and suspended with TX-100 (2.0 mg/mL) at 200-1000 nm. The peak was obtained at 276 nm for TX-100, followed by a flat line reached at baseline after 300 nm. The area at 650-850 is zoomed and shown in the box.

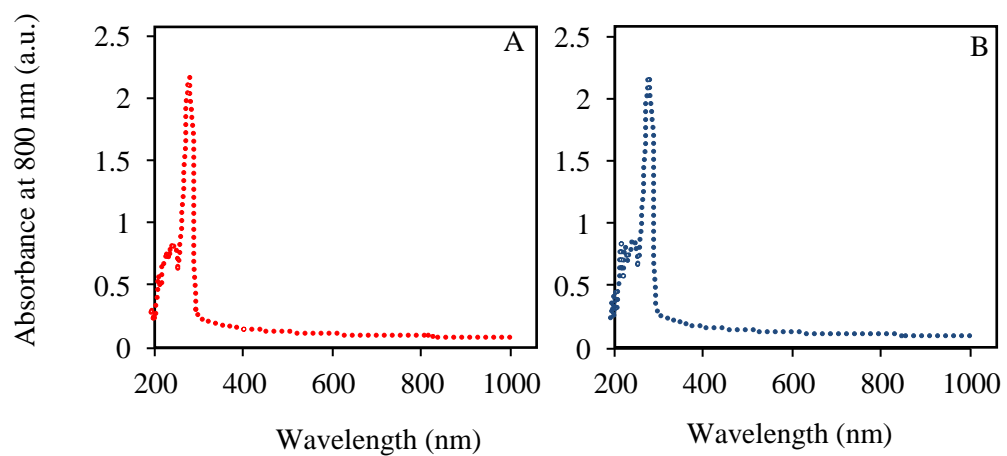

Figure S5: UV-Vis spectra of p-MWCNTs (A) and c-MWCNTs (B) at 200-1000 nm after digestion and suspended with TX-100 (2.0 mg/mL). The peak was obtained at 276 nm from the TX-100, followed by featureless spectra at 300-900 nm.

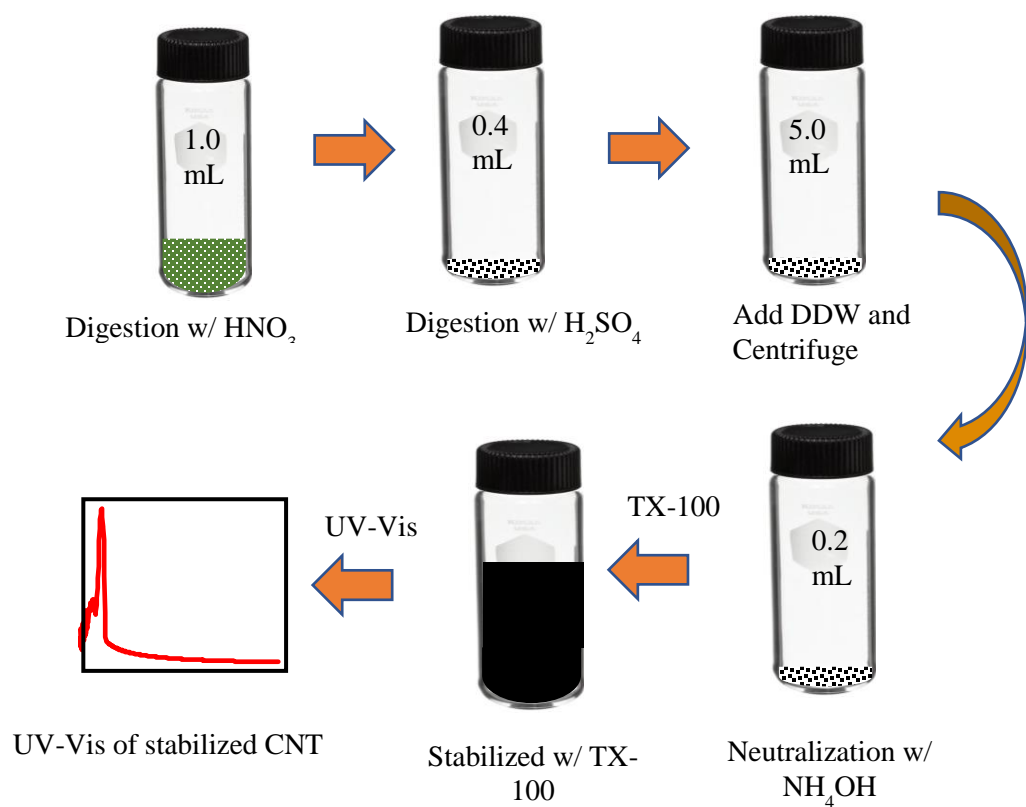

Figure S6: The final digestion scheme for sample preparation for spectroscopic analysis.



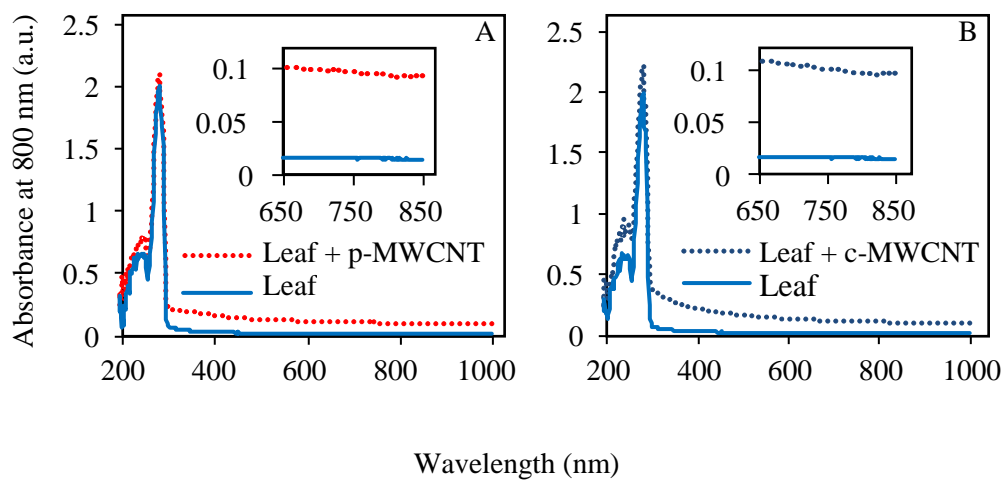

Figure S7: The spectra for p-MWCNTs (A), or c-MWCNTs (B) spiked leaf tissues digested, and suspended with TX-100. The panel inside shows the area zoomed at 650-850 nm.

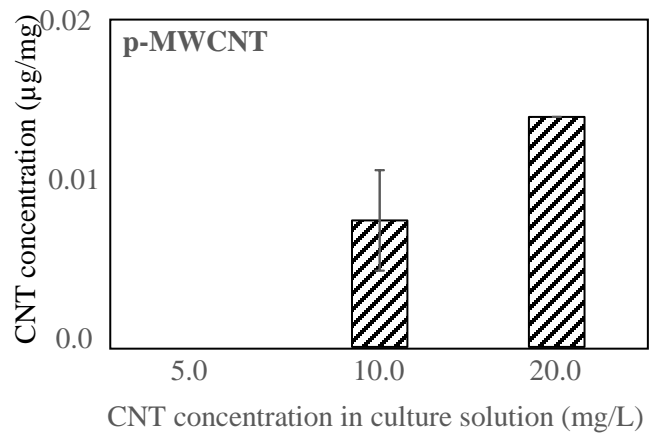

Figure S8: Concentrations of p-MWCNT in lettuce leaves quantified by digestion coupled with analysis of UV-Vis absorbance at 800 nm. The plants were grown in greenhouse at hydroponic system containing 5, 10, and 20 mg/L CNT solutions.

Table S1 Major physicochemical properties of CNTs used in this study.

| Properties                       | p-MWCNT | c-MWCNT | Characterization methods    |
|----------------------------------|---------|---------|-----------------------------|
| Average length ( $\mu\text{m}$ ) | <1.0    | <1.0    | TEM (from the manufacturer) |
| Average diameter (nm)            | 9.5     | 9.5     | TEM (from the manufacturer) |
| Bulk carbon content (%)          | 97%     | 85.9%   | Elemental analysis          |
| Bulk carboxyl                    | NA      | <8%     | TGA (from the manufacturer) |
| COOH (surface)                   | 1.2%    | 1.95%   | XPS                         |
| C=O (surface)                    | 4.28%   | 5.07%   | XPS                         |
| C-O (Surface)                    | 7.71%   | 9.62%   | XPS                         |

Table S2. Regression equation and statistics for p-MWCNT in Figure 4. Y indicates the detected UV-Vis absorbance at 800 nm calibrated by the background, and x indicates the applied p-MWCNT concentration in digestion solution ( $\mu\text{g/mL}$ ) or lettuce tissues ( $\mu\text{g/mg}$ ).

| Sample            | x                                                              | Equation                 | R <sup>2</sup> | P-value |
|-------------------|----------------------------------------------------------------|--------------------------|----------------|---------|
| p-MWCNT +<br>Leaf | concentration in<br>digestion solution<br>( $\mu\text{g/mL}$ ) | $y = 0.0097x - 0.000050$ | 0.99           | <0.01   |
| p-MWCNT +<br>Leaf | concentration in leaf<br>tissues ( $\mu\text{g/mg}$ )          | $y = 0.20x - 0.00060$    | 0.99           | <0.01   |
| p-MWCNT +<br>Stem | concentration in<br>digestion solution<br>( $\mu\text{g/mL}$ ) | $y = 0.0066x - 0.003$    | 0.99           | <0.01   |
| p-MWCNT +<br>Stem | concentration in stem<br>tissues ( $\mu\text{g/mg}$ )          | $y = 0.14x - 0.0054$     | 0.99           | <0.01   |
| p-MWCNT +<br>Root | concentration in<br>digestion solution<br>( $\mu\text{g/mL}$ ) | $y = 0.0086x + 0.0081$   | 0.95           | <0.01   |
| p-MWCNT +<br>Root | concentration in root<br>tissues ( $\mu\text{g/mg}$ )          | $y = 0.16x + 0.015$      | 0.95           | <0.01   |

Table S3. Regression equation and statistics for c-MWCNT in Figure 4. Y indicates the detected UV-Vis absorbance at 800 nm calibrated by the background, and x indicates the applied c-MWCNT concentration in digestion solution ( $\mu\text{g/mL}$ ) or lettuce tissues ( $\mu\text{g/mg}$ ).

| Sample            | x                                                              | Equation               | R <sup>2</sup> | P-value |
|-------------------|----------------------------------------------------------------|------------------------|----------------|---------|
| c-MWCNT +<br>Leaf | concentration in<br>digestion solution<br>( $\mu\text{g/mL}$ ) | $y = 0.0064x + 0.0062$ | 0.98           | <0.01   |
| c-MWCNT +<br>Leaf | concentration in leaf<br>tissues ( $\mu\text{g/mg}$ )          | $y = 0.12x + 0.012$    | 0.98           | <0.01   |
| c-MWCNT +<br>Stem | concentration in<br>digestion solution<br>( $\mu\text{g/mL}$ ) | $y = 0.0098x - 0.0044$ | 0.97           | <0.01   |
| c-MWCNT +<br>Stem | concentration in stem<br>tissues ( $\mu\text{g/mg}$ )          | $y = 0.20x - 0.0079$   | 0.97           | <0.01   |
| c-MWCNT +<br>Root | concentration in<br>digestion solution<br>( $\mu\text{g/mL}$ ) | $y = 0.0076x - 0.0059$ | 0.94           | <0.01   |
| c-MWCNT +<br>Root | concentration in root<br>tissues ( $\mu\text{g/mg}$ )          | $y = 0.17x - 0.013$    | 0.94           | <0.01   |

Table S4. Key parameters used for calculation of detection limit by using UV-Vis absorbance at 800 nm.

|         |      | Background | Standard deviation | $k$  | $b$     | Detection limit ( $\mu\text{g}/\text{mg}$ ) |
|---------|------|------------|--------------------|------|---------|---------------------------------------------|
| p-MWCNT | Leaf | 0.022      | 0.008              | 0.2  | -0.0006 | 1.23E-01                                    |
|         | Stem | 0.008      | 0.002              | 0.14 | -0.0054 | 8.14E-02                                    |
|         | Root | 0.015      | 0.006              | 0.16 | 0.015   | 1.88E-02                                    |
| c-MWCNT | Leaf | 0.022      | 0.008              | 0.12 | 0.012   | 1.00E-01                                    |
|         | Stem | 0.008      | 0.002              | 0.2  | -0.0079 | 6.95E-02                                    |
|         | Root | 0.015      | 0.006              | 0.17 | -0.013  | 1.82E-01                                    |
